# Supplementary material for: Use of Targeted Exome Sequencing for Molecular Diagnosis of Skeletal Disorders
Source: PLoS One. 2015 Sep 18;10(9):e0138314. doi: 10.1371/journal.pone.0138314 (PMC4575211; doi:10.1371/journal.pone.0138314)
Supplement: S2 Table — (XLS) [file pone.0138314.s003.xls]

## Sheet: S2 Table
S2 Table. List of the 309 selected genes known to be involved in genetic disorders of the skeleton, used in the gene panel design, alongside the associated phenotypes.
Gene	Phenotype
ACAN	Spondyloepimetaphyseal dysplasia, aggrecan type
ACP5	Spondyloenchondrodysplasia with immune dysregulation
ACVR1	Fibrodysplasia ossificans progressiva
ADAMTSL2	Geleophysic dysplasia 1
AFF3	Susceptibility to rheumatoid arthritis
AGA	Aspartylglucosaminuria
AGPS	Rhizomelic chondrodysplasia punctata, type 3
ALG6	Congenital disorder of glycosylation, type Ic
ALPL	Hypophosphatasia, adult; Hypophosphatasia, childhood; Hypophosphatasia, infantile; Odontohypophosphatasia.
ALX1	Frontonasal dysplasia 3
ALX3	Frontonasal dysplasia 1
ALX4	Frontonasal dysplasia 2; Parietal foramina 2
ANKH	Chondrocalcinosis 2; Craniometaphyseal dysplasia
ANO5	Gnathodiaphyseal dysplasia; Miyoshi muscular dystrophy 3; Muscular dystrophy, limb-girdle, type 2L
ANTXR2	Hyaline fibromatosis syndrome
ARSB	Mucopolysaccharidosis type VI (Maroteaux-Lamy)
ARSE	Chondrodysplasia punctata, X-linked recessive
ATP6V0A2	Cutis laxa, autosomal recessive, type IIA; Wrinkly skin syndrome.
B4GALT7	Ehlers-Danlos syndrome, progeroid form
BMPER	Diaphanospondylodysostosis
BMPR1B	Brachydactyly, type A2; Chrondrodysplasia, acromesomelic, with genital anomalies.
BRCA2	Fanconi anemia
BRIP1	Fanconi anemia, complementation group J
C14ORF179	Cranioectodermal dysplasia 3
CA2	Osteopetrosis, autosomal recessive 3, with renal tubular acidosis
CANT1	Desbuquois dysplasia
CASR	Hyperparathyroidism, neonatal; Hypocalcemia, autosomal dominant; Hypocalcemia, autosomal dominant, with Bartter syndrome; Hypocalciuric hypercalcemia, type I
CC2D2A	COACH syndrome; Joubert syndrome 9; Meckel syndrome 6.
CDH3	Ectodermal dysplasia, ectrodactyly, and macular dystrophy; Hypotrichosis, congenital, with juvenile macular dystrophy.
CDKN1C	Beckwith-Wiedemann syndrome; IMAGE syndrome.
CEP135	Microcephaly 8, primary, autosomal recessive
CEP290	Bardet-Biedl syndrome 14; Joubert syndrome 5; Leber congenital amaurosis 10; Meckel syndrome 4; Senior-Loken syndrome 6.
CHST14	Ehlers-Danlos syndrome, musculocontractural type
CHST3	Spondyloepiphyseal dysplasia with congenital joint dislocations
CLCN5	Dent disease; Hypophosphatemic rickets; Nephrolithiasis, type I; Proteinuria, low molecular weight, with hypercalciuric nephrocalcinosis
CLCN7	Osteopetrosis, autosomal dominant 2; Osteopetrosis, autosomal recessive 4
COG1	Congenital disorder of glycosylation, type IIg
COL10A1	Metaphyseal chondrodysplasia, Schmid type
COL11A1	Fibrochondrogenesis; Marshall syndrome; Stickler syndrome, type II; Lumbar disc herniation, susceptibility to
COL11A2	Deafness, autosomal dominant 13; Deafness, autosomal recessive 53; Fibrochondrogenesis 2; Otospondylomegaepiphyseal dysplasia; Stickler syndrome, type III; Weissenbacher-Zweymuller syndrome.
COL1A1	Caffey disease; Ehlers-Danlos syndrome, type I; Ehlers-Danlos syndrome, type VIIA; OI type II; OI type III; OI type IV; Osteogenesis imperfecta, type I; Bone mineral density variation QTL; Osteoporosis.
COL1A2	Ehlers-Danlos syndrome, cardiac valvular form; Ehlers-Danlos syndrome, type VIIB; Osteogenesis imperfecta, type II; Osteogenesis imperfecta, type III; Osteogenesis imperfecta, type IV; Osteoporosis, postmenopausal.
COL2A1	Achondrogenesis, type II or hypochondrogenesis; Avascular necrosis of the femoral head; Czech dysplasia; Epiphyseal dysplasia, multiple, with myopia and deafness; Kniest dysplasia; Legg-Calve-Perthes disease; Osteoarthritis with mild chondrodysplasia; Otospondylomegaepiphyseal dysplasia; Platyspondylic skeletal dysplasia, Torrance type; SED congenita; SED, Namaqualand type; SMED Strudwick type; S…
COL9A1	Epiphyseal dysplasia, multiple, 6; Stickler syndrome, type IV.
COL9A2	Epiphyseal dysplasia, multiple, 2; Stickler syndrome, type V; Epiphyseal dysplasia, multiple 1; Pseudoachondroplasia; Intervertebral disc disease, susceptibility to
COL9A3	Epiphyseal dysplasia, multiple, 3; Epiphyseal dysplasia, multiple, with myopathy; Intervertebral disc disease, susceptibility to.
COMP	Epiphyseal dysplasia, multiple 1; Pseudoachondroplasia
CREBBP	Rubinstein-Taybi syndrome
CRTAP	Osteogenesis imperfecta, type VII
CTSA	Galactosialidosis
CTSK	Pycnodysostosis
CUL7	3-M syndrome 1
DDR2	Spondylometaepiphyseal dysplasia, short limb-hand type
DHCR24	Desmosterolosis
DHODH	Miller syndrome
DLL3	Spondylocostal dysostosis, autosomal recessive, 1
DLX3	Amelogenesis imperfecta, hypomaturation-hypoplastic type, with taurodontism; Trichodontoosseous syndrome
DLX5	Split-hand/foot malformation 1 with sensorineural hearing loss
DMP1	Hypophosphatemic rickets, AR
DYM	Dyggve-Melchior-Clausen disease; Smith-McCort dysplasia (somente DYM).
DYNC2H1	Asphyxiating thoracic dystrophy 3; Short rib-polydactyly syndrome, type IIB; Short rib-polydactyly syndrome, type III.
EBP	Chondrodysplasia punctata, X-linked dominant
EFNB1	Craniofrontonasal dysplasia
EFTUD2	Mandibulofacial dysostosis, Guion-Almeida type
EIF2AK3	Wolcott-Rallison syndrome
ENPP1	Arterial calcification, generalized, of infancy, 1; Hypophosphatemic rickets, autosomal recessive, 2; Ossification of posterior longitudinal ligament of spine.
EP300	Colorectal cancer, somatic; Rubinstein-Taybi syndrome 2.
ERBB3	Lethal congenital contractural syndrome 2
ESCO2	Roberts syndrome; SC phocomelia syndrome.
EVC	Ellis-van Creveld syndrome; Weyers acrodental dysostosis
EVC2	Ellis-van Creveld syndrome
EXT1	Chondrosarcoma; Exostoses, multiple, type 1
EXT2	Exostoses, multiple, type 2
EZH2	Weaver syndrome 2
FAM123B	Osteopathia striata with cranial sclerosis
FAM154A	Weaver syndrome 2
FAM20C	Raine syndrome
FAM58A	STAR syndrome
FAM59A	Encodes an adaptor protein which functions in the epidermal growth factor (EGF) receptor-mediated signaling pathway
FANCA	Fanconi anemia, complementation group A
FANCB	Fanconi anemia, complementation group B
FANCC	Fanconi anemia, complementation group C
FANCD2	Fanconi anemia, complementation group D2
FANCE	Fanconi anemia, complementation group E
FANCF	Fanconi anemia, complementation group F
FANCG	Fanconi anemia, complementation group G
FANCI	Fanconi anemia, complementation group I
FANCL	Fanconi anemia, complementation group L
FANCM	Fanconi anemia, complementation group M
FBN1	Acromicric dysplasia; Aortic aneurysm, ascending, and dissection; Ectopia lentis, familial; Geleophysic dysplasia 2; Marfan syndrome; MASS syndrome; Stiff skin syndrome; Weill-Marchesani syndrome 2, dominant.
FBN2	Contractural arachnodactyly, congenital
FBXW4	split-hand/foot malformation-3
FCAMR	Cold-induced autoinflammatory syndrome, familial
FGD1	Aarskog-Scott syndrome; Mental retardation, X-linked syndromic 16
FGF10	Aplasia of lacrimal and salivary glands; LADD syndrome
FGF23	Hypophosphatemic rickets, autosomal dominant; Osteomalacia, tumor-induced; Tumoral calcinosis, hyperphosphatemic, familial
FGF9	Multiple synostoses syndrome 3
FGFR1	Hypogonadotropic hypogonadism 2 with or without anosmia; Jackson-Weiss syndrome; Osteoglophonic dysplasia; Pfeiffer syndrome; Trigonocephaly 1
FGFR2	Antley-Bixler syndrome without genital anomalies or disordered steroidogenesis; Apert syndrome; Beare-Stevenson cutis gyrata syndrome; Bent bone dysplasia syndrome; Craniofacial-skeletal-dermatologic dysplasia; Craniosynostosis, nonspecific; Crouzon syndrome; Gastric cancer, somatic; Jackson-Weiss syndrome; LADD syndrome; Pfeiffer syndrome; Saethre-Chotzen syndrome; Scaphocephaly and Axenfeld-Rie…
FGFR3	Achondroplasia; Bladder cancer, somatic; CATSHL syndrome; Cervical cancer, somatic; Colorectal cancer, somatic; Crouzon syndrome with acanthosis nigricans; Hypochondroplasia; LADD syndrome; Muenke syndrome; Nevus, epidermal, somatic; Spermatocytic seminoma, somatic Thanatophoric dysplasia, type I; Thanatophoric dysplasia, type II.
FKBP10	Osteogenesis imperfecta, type XI
FLNA	Cardiac valvular dysplasia, X-linked; FG syndrome 2; Frontometaphyseal dysplasia; Heterotopia, periventricular; Heterotopia, periventricular, ED variant; Intestinal pseudoobstruction, neuronal; Melnick-Needles syndrome; Otopalatodigital syndrome, type I; Otopalatodigital syndrome, type II; Terminal osseous dysplasia.
FLNB	Atelosteogenesis, type I; Atelosteogenesis, type III; Boomerang dysplasia; Larsen syndrome; Spondylocarpotarsal synostosis syndrome.
FMN1	Limb deformity
FOXC1	Axenfeld-Rieger syndrome, type 3; Iridogoniodysgenesis, type 1; Iris hypoplasia and glaucoma; Rieger or Axenfeld anomalies
FOXL2	Blepharophimosis, epicanthus inversus, and ptosis, type 1; Blepharophimosis, epicanthus inversus, and ptosis, type 2; Premature ovarian failure 3;
FUCA1	Fucosidosis
GALNS	Mucopolysaccharidosis IVA
GALNT3	Tumoral calcinosis, hyperphosphatemic, familial
GDF5	Acromesomelic dysplasia, Hunter-Thompson type; Brachydactyly, type A1, C; Brachydactyly, type A2; Brachydactyly, type C; Chondrodysplasia, Grebe type; Du Pan syndrome; Multiple synostoses syndrome 2; Symphalangism, proximal; Osteoarthritis-5
GDF6	Klippel-Feil syndrome 1, autosomal dominant; Microphthalmia with coloboma 6, digenic; Microphthalmia, isolated 4
GJA1	Atrioventricular septal defect 3; Hallermann-Streiff syndrome; Hypoplastic left heart syndrome 1; Hypoplastic left heart syndrome 1; Oculodentodigital dysplasia, autosomal recessive; Syndactyly, type III;
GLB1	GM1-gangliosidosis, type I; GM1-gangliosidosis, type II; GM1-gangliosidosis, type III; Mucopolysaccharidosis type IVB (Morquio)
GLI3	Greig cephalopolysyndactyly syndrome; Pallister-Hall syndrome; Polydactyly, postaxial, types A1 and B; Polydactyly, preaxial, type IV; Hypothalamic hamartomas, somatic
GNAI3	Auriculocondylar syndrome 1
GNAS	Acromegaly; ACTH-independent macronodular adrenal hyperplasia; McCune-Albright syndrome; Osseous heteroplasia, progressive; Prolonged bleeding time, brachydactyly and mental retardation; Prolonged bleeding time, brachydactyly, and mental retardation; Pseudohypoparathyroidism Ia; Pseudohypoparathyroidism Ib; Pseudohypoparathyroidism Ic; Pseudopseudohypoparathyroidism
GNPAT	Rhizomelic chondrodysplasia punctata
GNPTAB	Mucolipidosis II alpha/beta; Mucolipidosis III alpha/beta
GNPTG	Mucolipidosis III gamma
GNS	Mucopolysaccharidosis type IIID
GORAB	Geroderma osteodysplasticum
GPC6	Omodysplasia 1
GREM1	Short stature
GUSB	Mucopolysaccharidosis VII
H19	Beckwith-Wiedemann syndrome; Silver-Russell syndrome; Wilms tumor 2
HDAC4	Brachydacytly-mental retardation syndrome
HES7	Spondylocostal dysostosis 4, autosomal recessive
HGSNAT	Mucopolysaccharidosis type IIIC (Sanfilippo C)
HMGA2	Leiomyoma, uterine, somatic
HOXA11	Radioulnar synostosis with amegakaryocytic thrombocytopenia
HOXA13	Guttmacher syndrome; Hand-foot-uterus syndrome
HOXD13	Brachydactyly, type D; Brachydactyly, type E; Brachydactyly-syndactyly syndrome; Syndactyly, type V; Synpolydactyly with foot anomalies; Synpolydactyly, type II; VACTERL association
HPGD	Cranioosteoarthropathy; Digital clubbing, isolated congenital; Hypertrophic osteoarthropathy, primary, autosomal recessive 1
HSPG2	Dyssegmental dysplasia, Silverman-Handmaker type; Schwartz-Jampel syndrome, type 1
ICK	Endocrine-cerebroosteodysplasia
IDS	Mucopolysaccharidosis II
IDUA	Short stature
IFITM5	Osteogenesis imperfecta, type V
IFT122	Cranioectodermal dysplasia 1
IFT140	Mainzer-Saldino syndrome
IFT80	Asphyxiating thoracic dystrophy 2
IGF1R	Insulin-like growth factor I, resistance to
IGF2	Intrauterine growth restriction
IHH	Acrocapitofemoral dysplasia; Brachydactyly, type A1
IKBKG	Ectodermal dysplasia, hypohidrotic, with immune deficiency; Ectodermal, dysplasia, anhidrotic, lymphedema and immunodeficiency; Immunodeficiency, isolated; Incontinentia pigmenti, type II; Invasive pneumococcal disease, recurrent isolated, 2; Atypical mycobacteriosis, familial
IL1RN	Interleukin 1 receptor antagonist deficiency
KAT6B	Genitopatellar syndrome; SBBYSS syndrome
KCNQ10T1	Hemihypertrophy
KDM6A	Kabuki syndrome 2
KIF11	Microcephaly with or without chorioretinopathy, lymphedema, or mental retardation
KIF18A	Short stature
KIF22	Spondyloepimetaphyseal dysplasia with joint laxity, type 2
LBR	HEM skeletal dysplasia; Pelger-Huet anomaly; Reynolds syndrome
LEMD3	Buschke-Ollendorff syndrome; Melorheostosis with osteopoikilosis; Osteopoikilosis
LEPRE1	Osteogenesis imperfecta, type VIII
LETM1	Wolf-Hirschhorn
LFNG	Spondylocostal dysostosis, autosomal recessive 3
LIFR	Stuve-Wiedemann syndrome/Schwartz-Jampel type 2 syndrome
LMBR1	Acheiropody; Polydactyly, preaxial type II; Syndactyly, type IV; Triphalangeal thumb, type I; Triphalangeal thumb-polysyndactyly syndrome
LMNA	Cardiomyopathy, dilated, 1A; Charcot-Marie-Tooth disease, type 2B1; Emery-Dreifuss muscular dystrophy 2, AD; Emery-Dreifuss muscular dystrophy 3, AR; Heart-hand syndrome, Slovenian type; Hutchinson-Gilford progeria; Lipodystrophy, familial partial, 2; Malouf syndrome; Mandibuloacral dysplasia; Muscular dystrophy, congenital; Muscular dystrophy, limb-girdle, type 1B; Restrictive dermopathy, lethal
LMNB1	Leukodystrophy, adult-onset, autosomal dominant
LMNB2	Lipodystrophy, partial, acquired, susceptibility to
LMX1B	Nail-patella syndrome
LPIN2	Majeed syndrome
LRP4	Cenani-Lenz syndactyly syndrome; Sclerosteosis 2
LRP5	Exudative vitreoretinopathy 4; Hyperostosis, endosteal; Osteopetrosis, autosomal dominant 1; Osteoporosis-pseudoglioma syndrome; Osteosclerosis; [Bone mineral density variability 1; Osteoporosis
MAN2B1	Mannosidosis, alpha-, types I and II
MAN2C1	-
MANBA	Mannosidosis, beta
MATN3	Epiphyseal dysplasia, multiple, 5; Spondyloepimetaphyseal dysplasia; Osteoarthritis susceptibility 2
MBTPS2	IFAP syndrome with or without BRESHECK syndrome; Keratosis follicularis spinulosa decalvans, X-linked;
MED12	Lujan-Fryns syndrome; Opitz-Kaveggia syndrome
MESP2	Spondylocostal dysostosis, autosomal recessive 2
MEST	Intrauterine and postnatal growth retardation
MGP	Keutel syndrome; Natural teeth remaining intact
MKS1	Bardet-Biedl syndrome 13; Meckel syndrome 1
MLL	Wiedemann-Steiner syndrome; Leukemia, myeloid/lymphoid or mixed-lineage
MMP13	Metaphyseal anadysplasia 1; Spondyloepimetaphyseal dysplasia, Missouri type;
MMP2	Torg-Winchester syndrome
MMP9	Metaphyseal anadysplasia 2
MNX1	Currarino syndrome
MSX2	Craniosynostosis, type 2; Parietal foramina 1; Parietal foramina with cleidocranial dysplasia
MYCN	Feingold syndrome
NAGLU	Mucopolysaccharidosis type IIIB (Sanfilippo B)
NEK1	Short rib-polydactyly syndrome, type IIA
NEU1	Sialidosis, type I; Sialidosis, type II
NF1	Neurofibromatosis, type 1
NFIX	Marshall-Smith syndrome; Sotos syndrome 2
NIPBL	Cornelia de Lange syndrome 1
NKX3-2	Spondylo-megaepiphyseal-metaphyseal dysplasia
NLRP3	CINCA syndrome; Cold-induced autoinflammatory syndrome, familia; Muckle-Wells syndrome
NOG	Brachydactyly, type B2; Multiple synostosis syndrome 1; Stapes ankylosis with broad thumb and toes; Symphalangism, proximal; Tarsal-carpal coalition syndrome
NOTCH2	Alagille syndrome 2; Hajdu-Cheney syndrome
NPPC	Short stature
NPR2	Acromesomelic dysplasia, Maroteaux type
NR0B1	Adrenal hypoplasia, congenital, with hypogonadotropic hypogonadism;
NSD1	Beckwith-Wiedemann syndrome; Leukemia, acute myeloid; Sotos syndrome 1; Weaver syndrome
NSDHL	CHILD syndrome; CK syndrome
OBSL1	3-M syndrome 2
ODZ3	Microphthalmia
OFD1	Joubert syndrome 10; Oral-facial-digital syndrome 1; Simpson-Golabi-Behmel syndrome, type 2.
OSTM1	Osteopetrosis, autosomal recessive 5
PALB2	Fanconi anemia, complementation group N
PAPSS2	Brachyolmia 4 with mild epiphyseal and metaphyseal changes
PAX6	Aniridia; Cataract with late-onset corneal dystrophy; Coloboma of optic nerve; Coloboma, ocular; Foveal hyperplasia; Gillespie syndrome; Keratitis; Morning glory disc anomaly; Optic nerve hypoplasia; Peters anomaly
PCNT	Microcephalic osteodysplastic primordial dwarfism, type II
PDE4D	Acrodysostosis 2, with or without hormone resistance; Stroke, susceptibility to, 1
PEX7	Peroxisome biogenesis disorder 9B; Rhizomelic chondrodysplasia punctata, type 1
PHEX	Hypophosphatemic rickets, X-linked dominant
PIGV	Hyperphosphatasia with mental retardation syndrome 1
PITX1	Clubfoot, congenital, with or without deficiency of long bones and/or mirror-image polydactyly; Liebenberg syndrome
PLCB4	Auriculocondylar syndrome 2
PLEKHM1	Osteopetrosis, autosomal recessive 6
PLOD2	Bruck syndrome 2
POC1A	Short stature, onychodysplasia, facial dysmorphism, and hypotrichosis
POLR1C	Treacher Collins syndrome 3
POLR1D	Treacher Collins syndrome 2
POP1	Skeletal dysplasia
POR	Antley-Bixler syndrome with genital anomalies and disordered steroidogenesis; Disordered steroidogenesis due to cytochrome P450 oxidoreductase;
PORCN	Focal dermal hypoplasia
PPGB	Galactosialidosis
PPIB	Osteogenesis imperfecta, type IX
PRKAR1A	Acrodysostosis 1, with or without hormone resistance; Adrenocortical tumor, somatic; Carney complex, type 1; Myxoma, intracardiac; Pigmented nodular adrenocortical disease, primary, 1; Thyroid carcinoma, papillary, somatic
PTHLH	Brachydactyly, type E2; Humoral hypercalcemia of malignancy
PTHR1	Chondrodysplasia, Blomstrand type; Eiken syndrome; Failure of tooth eruption, primary; Metaphyseal chondrodysplasia, Murk Jansen type;
PTPN11	LEOPARD syndrome 1; Leukemia, juvenile myelomonocytic; Metachondromatosis; Noonan syndrome 1
PYCR1	Cutis laxa, autosomal recessive, type IIB; Cutis laxa, autosomal recessive, type IIIB
RAB23	Carpenter syndrome
RAD51C	Fanconi anemia, complementation group 0
RASGRP2	Short stature
RBPJ	Adams-Oliver syndrome 3
RECQL4	Baller-Gerold syndrome; RAPADILINO syndrome; Rothmund-Thomson syndrome
RIPK4	Popliteal pterygium syndrome 2, lethal type
RMRP	Anauxetic dysplasia; Cartilage-hair hypoplasia; Metaphyseal dysplasia without hypotrichosis
RNU4ATAC	Microcephalic osteodysplastic primordial dwarfism, type I
ROR2	Brachydactyly, type B1; Robinow syndrome, autosomal recessive
RPGRIP1L	COACH syndrome; Joubert syndrome 7; Meckel syndrome 5
RUNX2	Cleidocranial dysplasia; Cleidocranial dysplasia, forme fruste, dental anomalies only; Cleidocranial dysplasia, forme fruste, with brachydactyly; Metaphyseal dysplasia with maxillary hypoplasia with or without brachydactyly.
SALL1	Townes-Brocks branchiootorenal-like syndrome; Townes-Brocks syndrome
SALL4	Duane-radial ray syndrome; IVIC syndrome
SBDS	Shwachman-Bodian-Diamond syndrome
SERPINH1	Osteogenesis imperfecta, type X; Preterm premature rupture of the membranes, susceptibility to
SF3B4	Acrofacial dysostosis 1, Nager type
SGSH	Mucopolysaccharidisis type IIIA (Sanfilippo A)
SH3BP2	Cherubism
SH3PXD2B	Frank-ter Haar syndrome
SHH	Holoprosencephaly-3
SHOX	Langer mesomelic dysplasia; Leri-Weill dyschondrosteosis; Short stature, idiopathic familial
SHOX2	Short stature
SLC17A5	Salla disease; Sialic acid storage disorder, infantile
SLC26A2	Achondrogenesis Ib; Atelosteogenesis II; De la Chapelle dysplasia; Diastrophic dysplasia; Diastrophic dysplasia , broad bone-platyspondylic variant; Epiphyseal dysplasia, multiple, 4
SLC29A3	Histiocytosis-lymphadenopathy plus syndrome
SLC34A3	Hypophosphatemic rickets with hypercalciuria
SLC35D1	Schneckenbecken dysplasia
SLC39A13	Spondylocheirodysplasia, Ehlers-Danlos syndrome-like
SLCO2A1	Hypertrophic osteoarthropathy, primary, autosomal recessive 2
SLCO5A1	Mesomelia-synostoses syndrome
SLX4	Fanconi anemia, complementation group P
SMAD4	Juvenile polyposis/hereditary hemorrhagic telangiectasia syndrome; Myhre syndrome; Polyposis, juvenile intestinal
SMARCAL1	Schimke immunoosseous dysplasia
SMOC2	Dentin dysplasia, type I, with microdontia and misshapen teeth
SOST	Craniodiaphyseal dysplasia, autosomal dominant; Sclerosteosis; Van Buchem disease; Trichorhinophalangeal syndrome, type II
SOX3	Mental retardation, X-linked, with isolated growth hormone deficiency; Panhypopituitarism, X-linked
SOX9	Acampomelic campomelic dysplasia; Campomelic dysplasia; Campomelic dysplasia with autosomal sex reversal
SP7	Osteogenesis imperfecta, type XII;
SRCAP	Floating-Harbor syndrome
SULF1	Mesomelia-synostosis
SUMF1	Multiple sulfatase deficiency
TBCE	Hypoparathyroidism-retardation-dysmorphism syndrome; Kenny-Caffey syndrome-1
TBX1	Conotruncal anomaly face syndrome; DiGeorge syndrome; Tetralogy of Fallot; Velocardiofacial syndrome
TBX15	Cousin syndrome
TBX3	Ulnar-mammary syndrome
TBX4	Small patella syndrome
TBX5	Holt-Oram syndrome
TBXAS1	Thromboxane synthase deficiency; Ghosal hematodiaphyseal syndrome
TCIRG1	Osteopetrosis, autosomal recessive 1
TCOF1	Treacher Collins syndrome 1
TCTN3	Joubert syndrome 18; Orofaciodigital syndrome IV
TGFB1	Camurati-Engelmann disease; Cystic fibrosis lung disease, modifier of
TGFBR1	Loeys-Dietz syndrome, type 1A; Loeys-Dietz syndrome, type 2A; Multiple self-healing squamous epithelioma, susceptiblity to
TGFBR2	Loeys-Dietz syndrome, type 1B; Loeys-Dietz syndrome, type 2B
TGM6	Spinocerebellar ataxia 35
THPO	Thrombocythemia 1
THRA	Hypothyroidism, congenital, nongoitrous, 6
TMEM165	Congenital disorder of glycosylation, type IIk
TMEM216	Joubert syndrome 2; Meckel syndrome 2
TMEM67	COACH syndrome; Joubert syndrome 6; Meckel syndrome 3; Nephronophthisis 11; Bardet-Biedl syndrome 14, modifier of;
TNFRSF11A	Osteolysis, familial expansile; Osteopetrosis, autosomal recessive 7; Paget disease of bone
TNFRSF11B	Paget disease, juvenile
TNFSF11	Osteopetrosis, autosomal recessive 2
TP63	ADULT syndrome; Ectrodactyly, ectodermal dysplasia, and cleft lip/palate syndrome 3; Hay-Wells syndrome; Limb-mammary syndrome; Orofacial cleft 8; Rapp-Hodgkin syndrome; Split-hand/foot malformation 4
TRAPPC2	Spondyloepiphyseal dysplasia tarda
TREM2	Nasu-Hakola disease
TRIP11	Achondrogenesis, type IA
TRPS1	Trichorhinophalangeal syndrome, type I; Trichorhinophalangeal syndrome, type III
TRPV4	Brachyolmia type 3; Digital arthropathy-brachydactyly, familial; Hereditary motor and sensory neuropathy, type Iic; Metatropic dysplasia; Parastremmatic dwarfism; Scapuloperoneal spinal muscular atrophy; SED, Maroteaux type; Spinal muscular atrophy, distal, congenital nonprogressive; Spondylometaphyseal dysplasia, Kozlowski type; Sodium serum level QTL 1.
TSSC4	Short stature
TWIST1	Craniosynostosis, type 1; Robinow-Sorauf syndrome; Saethre-Chotzen syndrome; Saethre-Chotzen syndrome with eyelid anomalies
TYROBP	Nasu-Hakola disease
UCMA	Upper zone of growth plate and cartilage matrix associated
WDR19	Asphyxiating thoracic dystrophy 5; Cranioectodermal dysplasia 4; Nephronophthisis 13
WDR35	Cranioectodermal dysplasia 2; Short rib-polydactyly syndrome, type V
WHSC1	Wolf-Hirschhorn Syndrome
WHSC2	Wolf-Hirschhorn Syndrome
WISP3	Arthropathy, progressive pseudorheumatoid, of childhood; Spondyloepiphyseal dysplasia tarda with progressive arthropathy
WNT3	Tetra-amelia, autosomal recessive
WNT5A	Robinow syndrome, autosomal dominant
WNT7A	Fuhrmann syndromeUlna and fibula, absence of, with sever limb deficiency
XRCC2	Fanconi anemia
ZBTB38	Short stature
ZMPSTE24	Mandibuloacral dysplasia with type B lipodystrophy; Restrictive dermopathy, lethal
ZRS intronic	Acheiropody; Polydactyly, preaxial type II; Syndactyly, type IV; Triphalangeal thumb, type I; Triphalangeal thumb-polysyndactyly syndrome
SNPs in the regulatory region of SHOX gene	Upstream: rs17719268 Downstream: rs17792837, rs5946480, rs5946551, rs4243986, rs4413965
SNPs in the regulatory region of SOX9 gene	Upstream: rs9904355, rs11867678, rs12603695, rs9913988, rs9901939, rs4519368
SNPs in the deleted regions causing Kabuki syndrome	rs2977790, rs4841196, rs9969455, rs13249540, rs13265064
SNPs in the deleted regions causing Wolf-Hirschhorn syndrome	rs12644638, rs2298965, rs4690055, rs2032463, rs1419046, rs1313772
